# Supplementary material
Source: MDPI journal article supplement (https://www.mdpi.com/1999-4907/14/7/1474)
Supplement: s1 [file s1]

## Appendix

### Divergent responses of NPP to climate factors among forest types at interannual and inter-monthly scales: An empirical study on four typical forest types in subtropical China

Table S.1 Ecophysiological parameters of the forest types used in the model

| Parameter                                      | Units        | ENF   | EBF    | Bambo<br>o |
|------------------------------------------------|--------------|-------|--------|------------|
| annual leaf and fine root turnover fraction    | 1/year       | 0.26  | 0.5    | 0.675**    |
| annual live wood turnover fraction             | 1/year       | 0.7   | 0.7    | 0.7        |
| annual whole-plant mortality fraction          | 1/year       | 0.005 | 0.005  | 0.005      |
| annual fire mortality fraction                 | 1/year       | 0.005 | 0.002  | 0.005      |
| (ALLOCATION) new fine root C: new leaf C       | ratio        | 1.4   | 1.2**  | 1          |
| (ALLOCATION) new stem C: new leaf C            | ratio        | 2.2   | 2.2    | 1.8        |
| (ALLOCATION) new live wood C: new total wood C | ratio        | 0.071 | 0.16   | 0.1        |
| (ALLOCATION) new croot C: new stem C           | ratio        | 0.29  | 0.3    | 0.42       |
| (ALLOCATION) current growth proportion         | prop.        | 0.5   | 0.5    | 0.5        |
| C: N of leaves                                 | kg C/kg<br>N | 39.2* | 32.44* | 41.73*     |
| C: N of leaf litter, after retrain location    | kg C/kg<br>N | 93    | 49     | 93         |
| C: N of fine roots                             | kg C/kg<br>N | 63*   | 57.18* | 72.9*      |
| C: N of live wood                              | kg C/kg<br>N | 63*   | 57.18* | 72.9*      |
| C: N of dead wood                              | kg C/kg<br>N | 823*  | 400*   | 729        |
| leaf litter labile proportion                  | DIM          | 0.31  | 0.32   | 0.32       |
| leaf litter cellulose proportion               | DIM          | 0.45  | 0.44   | 0.44       |
| leaf litter lignin proportion                  | DIM          | 0.24  | 0.24   | 0.24       |
| fine root labile proportion                    | DIM          | 0.34  | 0.3    | 0.3        |
| fine root cellulose proportion                 | DIM          | 0.44  | 0.45   | 0.45       |
| fine root lignin proportion                    | DIM          | 0.22  | 0.25   | 0.25       |
| dead wood cellulose proportion                 | DIM          | 0.71  | 0.76   | 0.76       |
| dead wood lignin proportion                    | DIM          | 0.29  | 0.24   | 0.24       |
| canopy water interception coefficient          | 1/LAI/d      | 0.045 | 0.01** | 0.041      |

|                                                          |                      |             |             |          |
|----------------------------------------------------------|----------------------|-------------|-------------|----------|
| canopy light extinction coefficient                      | DIM                  | 0.51        | 0.7         | 0.2698** |
| all-sided to projected leaf area ratio                   | DIM                  | 2.6         | 2           | 2        |
| canopy average specific leaf area (projected area basis) | m <sup>2</sup> /kg C | 8.2*        | 13.2*       | 13.28*   |
| ratio of shaded SLA: sunlit SLA                          | DIM                  | 2           | 2           | 2        |
| fraction of leaf N in Rubisco                            | DIM                  | 0.08        | 0.06        | 0.06     |
| maximum stomatal conductance (projected area basis)      | m/s                  | 0.006       | 0.005       | 0.006**  |
| cuticular conductance (projected area basis)             | m/s                  | 0.0000<br>6 | 0.0000<br>1 | 0.00001  |
| boundary layer conductance (projected area basis)        | m/s                  | 0.09        | 0.01        | 0.01     |
| leaf water potential: start of conductance reduction     | MPa                  | -0.65       | -0.6        | -0.6     |
| leaf water potential: complete conductance reduction     | MPa                  | -2.5        | -3.9        | -3.9     |
| vapor pressure deficit: start of conductance reduction   | Pa                   | 610         | 1800        | 930      |
| vapor pressure deficit: complete conductance reduction   | Pa                   | 3100        | 4100        | 4100     |

---

Note: \* represents parameters derived from field measurements in this study; \*\* represents parameters derived from references; unlabeled parameters are derived from default values given by the study of White et al. [40].
